1     **Differential Effector Response of Amnion- and Adipose-Derived Mesenchymal Stem Cells**  
2                             **to Inflammation; Implications for Intradiscal Therapy**

3     Ryan Borem, PhD,<sup>1</sup> Allison Madeline,<sup>1</sup> Mackenzie Bowman, MS,<sup>1</sup> Sanjitpal Gill, MD,<sup>1,2</sup> John  
4                             Tokish, MD,<sup>1,3</sup> Jeremy Mercuri, PhD<sup>1</sup>

5     <sup>1</sup>Laboratory of Orthopaedic Tissue Regeneration & Orthobiologics, Department of  
6     Bioengineering, Clemson University, Clemson, SC 29634, USA

7     <sup>2</sup>Department of Orthopaedic Surgery, Medical Group of the Carolinas-Pelham, Spartanburg  
8     Regional Healthcare System, Greer, SC, 29651, USA

9     <sup>3</sup>Department of Orthopaedic Surgery, Mayo Clinic, Phoenix, AZ, 85054, USA

10    **Running Head:** Stem Cell Response to Inflammation

11    **Corresponding Author:**

12    Jeremy J. Mercuri

13    401 Rhodes Engineering Research Center

14    Clemson University, Clemson, SC 29634, USA

15    Email: [jmercur@clemson.edu](mailto:jmercur@clemson.edu)

16    Phone: (864) 656-0978   Fax: (864) 656-4466

17    **Author contribution statement:** RB, SG, JT, and JM contributed to conception and design of the  
18    study. RB, AM, MB, JM contributed to data acquisition, analysis, and data interpretation. RB and  
19    JM contributed to drafting of the manuscript and statistical analysis. SG, JT, and JM provided  
20    administrative, technical, and material support for this study. All authors provided critical revision  
21    of the manuscript for important intellectual content, and all have read and approved the final  
22    submitted manuscript.

## 1 ABSTRACT

2 Intervertebral disc degeneration (IVDD) is a progressive condition marked by  
3 inflammation and tissue destruction. The effector functions of mesenchymal stem cells (MSCs)  
4 make them an attractive therapy for patients with IVDD. While several sources of MSCs exist, the  
5 optimal choice for use in the inflamed IVD remains a significant question. Adipose (AD)- and  
6 amnion (AM)-derived MSCs have several advantages compared to other sources, however, no  
7 study has directly compared the impact of IVDD inflammation on their effector functions. Human  
8 MSCs were cultured in media with or without supplementation of interleukin-1 $\beta$  and tumor  
9 necrosis factor- $\alpha$  at concentrations produced by IVDD cells. MSC proliferation and production of  
10 pro- and anti-inflammatory cytokines were quantified following 24- and 48-hours of culture.  
11 Additionally, the osteogenic and chondrogenic potential of AD- and AM-MSCs was characterized  
12 via histology and biochemical analysis following 28 days of culture. In inflammatory culture, AM-  
13 MSCs produced significantly more anti-inflammatory IL-10 ( $p=0.004$ ) and larger chondrogenic  
14 pellets ( $p=0.04$ ) with greater percent area staining positively for glycosaminoglycan ( $p<0.001$ )  
15 compared to AD-MSCs. Conversely, AD-MSCs proliferated more resulting in higher cell numbers  
16 ( $p=0.048$ ) and produced higher concentrations of pro-inflammatory cytokines PGE<sub>2</sub> ( $p=0.030$ ) and  
17 IL-1 $\beta$  ( $p=0.010$ ) compared to AM-MSCs. Additionally, AD-MSCs produced more mineralized  
18 matrix ( $p<0.001$ ) compared to AM-MSCs. These findings begin to inform researchers and  
19 clinicians as to which MSC source may be optimal for different IVD therapies including those that  
20 may promote regeneration or fusion. Further study is warranted evaluating these cells in systems  
21 which recapitulate the nutrient- and oxygen-deprived environment of the degenerate IVD.

22 **KEYWORDS:** Mesenchymal stem cell; intervertebral disc degeneration; amnion; adipose;  
23 inflammation; differentiation;

## 1 INTRODUCTION

2 Intervertebral disc (IVD) degeneration imparts significant socioeconomic burden resulting  
3 in annual direct costs estimated to exceed \$100B in the U.S.[1] This pathology is mediated in part  
4 by increased levels of pro-inflammatory cytokines including interleukin-1 beta (IL-1 $\beta$ ) and tumor  
5 necrosis factor – alpha (TNF- $\alpha$ ).[2] Elevated levels of these cytokines stimulate resident IVD cells  
6 to produce extracellular matrix (ECM) degrading proteases that break down tissue.[3] IVD tissues  
7 are unable to regenerate as they have limited blood supply and relatively low numbers of active  
8 resident cells.[4] Current treatments for IVD degeneration are not curative; they primarily attempt  
9 to alleviate pain and inflammation. Ultimately, this pathology becomes debilitating and thus  
10 warrant spinal fusion or IVD arthroplasty. Due to the shortcomings associated with current surgical  
11 treatments, the orthopaedic community has turned their attention towards the therapeutic potential  
12 of mesenchymal stem cells (MSCs).

13 Populations of MSCs are found throughout adult tissues; however, their numbers are  
14 limited. Thus, MSCs are often harvested and expanded *in vitro* prior to administration for  
15 therapeutic purposes. The most common tissue sources of MSCs utilized include bone marrow  
16 (BM), adipose (AD), and more recently amniotic membrane (AM). It has been established through  
17 laboratory studies that MSCs possess several effector functions which make them excellent  
18 candidates as biologic therapies for IVD degeneration. MSCs secrete soluble chemicals (i.e.,  
19 cytokines, chemokines, and growth factors) including prostaglandin E2 (PGE<sub>2</sub>), transforming  
20 growth factor-beta (TGF- $\beta$ ), and TNF- $\alpha$  stimulated gene/protein 6 (TSG-6) that can serve an anti-  
21 inflammatory function.[5–7] Additionally, soluble signals released by MSCs have been shown to  
22 stimulate resident cells to produce new ECM.[8] Moreover, MSCs have been shown to  
23 differentiate into several musculoskeletal cell types and generate new IVD ECM *in vitro*.[9] These

1 findings have prompted clinical trials evaluating the safety and efficacy of intradiscal  
2 administration of MSCs to attenuate progression of IVD degeneration. These trials have yielded  
3 improved pain and functional outcomes in patients with Pfirrmann grade II-V IVD degeneration.  
4 [10,11] However, identification of an MSC source which demonstrates optimal therapeutic  
5 outcomes within the complex pathological environment of the IVD has yet to be defined. [8,9,11]

6 Research has been conducted to compare the differentiation capacity of several MSC  
7 sources using established *in vitro* protocols.[12–14] Topoluk et al. aimed to identify an optimal  
8 MSC source for bone and cartilage regeneration by comparing the osteogenic and chondrogenic  
9 differentiation capacity of AM- and AD-MSCs.[12] These two MSC sources were chosen for study  
10 as they have higher yields and impart less donor site morbidity at harvest compared to BM-MSCs.  
11 The authors demonstrated that AM-MSCs exhibited enhanced gene and ECM markers for bone  
12 and cartilage formation compared to AD-MSCs.[12] More recently, the same authors also  
13 demonstrated that AM-MSCs are more effective at chondroprotection and skewing pro-  
14 inflammatory M1 macrophages towards a pro-regenerative M2 phenotype compared to AD-  
15 MSCs.[15] However, considering MSCs are often administered into the inflamed environment of  
16 the degenerate IVD, it is imperative to understand the influence of inflammation on the therapeutic  
17 effector functions of AM- and AD-MSCs. Such information will help further identify which of  
18 these MSC types may be more optimal for therapeutic use in IVD degeneration. Thus, the objective  
19 herein was to determine and compare the effect of inflammation on AM- and AD-MSC  
20 proliferation, production of cytokines and differentiation.

## 21 **MATERIALS & METHODS**

### 22 *MSC Expansion*

1 Human AD-MSCs were purchased from Invitrogen. Human AM-MSCs were isolated from via  
2 informed consent under an IRB approved protocol from an ethics committee according to  
3 previously published methods.[12] All MSCs were expanded under standard culture conditions  
4 (37°C with 5% CO<sub>2</sub>) until passage 3 (P3). Culture medium consisted of Dulbecco's Modified  
5 Eagle's Medium (DMEM) containing 10% fetal bovine serum (FBS), and 1%  
6 antibiotic/antimitotic (Ab/Am).

### 7 *Impact of Inflammation of MSC Proliferation and Cytokine Production*

#### 8 *Non-Inflammatory and IVD degeneration-mimetic Inflammatory (INF) Culture Conditions*

9 Non-inflammatory (control) conditions included culturing MSCs in DMEM containing 2% FBS  
10 and 1% Ab. Inflammatory (INF) media consisted of culture media described above supplemented  
11 with human recombinant IL-1 $\beta$  (500pg/ml; PeproTech) and TNF- $\alpha$  (400pg/ml; PeproTech). The  
12 concentration of the proinflammatory cytokines used was chosen to mimic levels produced within  
13 degenerate (e.g., Pfirrmann Grade IV-V) human IVD tissues. [16] Cells were seeded at 1x10<sup>5</sup> into  
14 tissue culture-treated 12-well plates (n=3/condition/cell-type) and cultured for 12- and 48-hours.

#### 15 *MSC Proliferation*

16 Proliferation of MSCs was evaluated by determining the total cell count per well (n=3  
17 wells/treatment/time-point) using a TC20 Automated Cell Counter (Bio-Rad).

#### 18 *Cytokine Array and ELISA Analysis of Cell Culture Media for MSC Cytokine Production Studies*

19 Media samples (n=3/condition/cell-type/time-point) were analyzed for several inflammatory  
20 cytokines including pro-inflammatory interleukins-1 beta (IL-1 $\beta$ ), -1 alpha (IL-1 $\alpha$ ), -6 (IL-6), -8  
21 (IL-8), and monocyte chemotactic protein-1 (MCP-1) as well as anti-inflammatory interleukins -4

1 (IL-4) and -10 (IL-10), using a quantitative glass slide array (RayBiotech) according to  
2 manufacturer's instructions. Pro-inflammatory prostaglandin E2 (PGE2) was also analyzed from  
3 media samples (n=3/condition/cell-type/time-point) via enzyme-linked immunosorbent assay  
4 (Abcam) according to the manufacturer's instructions. All values were calculated as the difference  
5 in cytokine concentration (pg/ml) produced by MSCs relative to media only controls.

#### 6 *Impact of Inflammation on MSC Osteogenesis and Chondrogenesis*

#### 7 *Non-Inflammatory and Inflammatory Osteogenic Culture Conditions*

8 To induce osteogenic differentiation,  $1.0 \times 10^5$  cells were seeded in 12-well plates  
9 (n=3/condition/cell-type) and cultured in monolayer in differentiation media (StemPro Osteogenic  
10 Media; ThermoFisher Scientific) for 28 days. For inflammatory conditions, differentiation media  
11 was supplemented with IL-1 $\beta$  and TNF- $\alpha$  at concentrations described above.

#### 12 *Analysis of ECM Mineralization*

13 Osteogenic differentiation was assessed histologically via Alizarin Red staining. Briefly, MSC-  
14 seeded well plates were fixed in 4% paraformaldehyde before incubation in 40mM Alizarin Red  
15 to detect mineralization. Histological images were captured, and quantification of staining was  
16 performed via colorimetric analysis. Briefly, wells were treated with 10% acetic acid and incubated  
17 for 30 minutes. The fluid was transferred to microcentrifuge tubes and heated to 85°C for 10  
18 minutes. Samples were centrifuged at 20,000g for 15 minutes, supernatant was collected and  
19 resuspended in 10% ammonium hydroxide prior to reading the absorbance 405nm. Results are  
20 expressed as relative absorbance units (RAUs).

#### 21 *Non-Inflammatory and Inflammatory Chondrogenic Culture Conditions*

1 To induce chondrogenic differentiation, MSCs were seeded in pellets ( $1.0 \times 10^5$  cells per pellet;  
2  $n=3$  pellets/condition/cell-type) and cultured in differentiation media (StemPro Chondrogenic  
3 Media; ThermoFisher Scientific) for 28 days. For inflammatory conditions, differentiation media  
4 was supplemented with IL-1 $\beta$  and TNF- $\alpha$  at the concentrations described above. Differentiation  
5 was assessed histologically via Alcian Blue staining and quantitatively via pellet area analysis, the  
6 percent area of pellet stained positively for GAG, DNA, and GAG content analyses, respectively.

#### 7 *Analysis of Chondrogenic Pellet Area*

8 MSC pellets were imaged using phase contrast in well plates. Cross-sectional area [ $\text{mm}^2$ ] of pellets  
9 ( $n=3$ /condition/cell-type) were calculated from pellet diameters obtained using NIH ImageJ  
10 software.

#### 11 *Analysis of Chondrogenic Pellet Glycosaminoglycan Staining*

12 Chondrogenic MSC pellets ( $n=3$ /condition/cell-type) were fixed in 10% non-buffered formalin,  
13 paraffin embedded and sectioned to 5 $\mu\text{m}$ . Slides were stained with Alcian Blue (1% Alcian Blue  
14 in 3% aqueous acetic acid; pH 2.5) and counterstained with 0.1% aqueous Nuclear Fast Red for  
15 visualization of glycosaminoglycan deposition and cell nuclei, respectively. Histological images  
16 were captured, and the percentage of the total cell pellet area stained positively for GAG was  
17 quantified via color threshold analysis using NIH ImageJ software.

#### 18 *Analysis of Chondrogenic Pellet DNA and Glycosaminoglycan Content*

19 Chondrogenic MSC pellets ( $n=3$ /condition/cell-type) were analyzed for DNA and GAG content  
20 using PicoGreen and DMMB assays, respectively according to manufacturer's instructions.  
21 Briefly, cell pellets were digested in PBE buffer (pH 7.5) containing 5 mM L-Cysteine, 100 mM

1 dibasic phosphate buffer, and 5 mM EDTA and 125  $\mu\text{g/mL}$  papain at 65°C for 24 hours prior to  
2 analysis via respective assays. GAG content was determined from a standard curve containing  
3 known concentrations of chondroitin-6-sulfate. DNA content was determined from a standard  
4 curve developed from known concentrations of DNA supplied by the manufacturer.

### 5 *Microscopic Imaging*

6 All images were captured on a Zeiss Axio Vert.A1 microscope with AxioVision software (SE64  
7 Rel. 4.9.1 SP08-2013).

### 8 *Statistics*

9 Statistical analysis was performed using GraphPad Prism 7 software. Quantitative results are  
10 expressed as a mean  $\pm$  standard error (SEM). Comparisons were performed via Student's t-tests of  
11 equal variance comparing between control and inflammatory study groups at respective time-  
12 points. Significance was defined as  $p \leq 0.050$ , and significant trends were defined as  $p \leq 0.080$ .

## 13 **RESULTS**

### 14 *Impact of Inflammation on Proliferation of AD- and AM-MSCs*

15 In general, inflammation promoted an increase in cell number between 12- and 48-hours in both  
16 AD- and AM-MSCs compared to control conditions; however, this was found to be significant  
17 only in AD-MSCs cultures. The number of AD-MSCs significantly increased over time in  
18 inflammatory media (12-hours: 113,000  $\pm$  4,163 cells, 48-hours: 221,000  $\pm$  8,021 cells;  $p < 0.001$ ),  
19 but not in control media (12-hour: 119,350  $\pm$  22,650 cells, 48-hour: 173,333  $\pm$  20,305 cells). The  
20 number of AM-MSCs also increased over time in inflammatory (12-hour: 87,250  $\pm$  8,151 cells,



1 48-hour:  $109,667 \pm 5,696$  cells) and control media (12-hour:  $101,250 \pm 2,250$  cells, 48-hour:  
2  $114,500 \pm 12,500$  cells), however these increases were not significant.

3 Comparing the two MSC types, inflammation resulted in a significantly higher number of AD-  
4 MSCs at both 12- ( $p=0.048$ ) and 48- ( $p<0.001$ ) hours compared to AM-MSCs.

#### 5 *Impact of Inflammation on Cytokine Production by AD- and AM-MSCs*

6 Inflammation resulted in an increase in MSC production of both pro- and anti-inflammatory  
7 cytokines (**Figures 1&2**). Compared to controls at 12- and 48-hours, respectively, AD-MSCs in  
8 inflammation demonstrated significant increases in the production of PGE<sub>2</sub>, MCP-1, IL-1 $\beta$  and IL-  
9 8 (**Table 1**). Compared to controls at 12- and 48-hours, respectively, AM-MSCs in inflammation  
10 demonstrated significant increases in the production of PGE<sub>2</sub>, MCP-1, IL-1 $\beta$ , IL-6, IL-8 and IL-  
11 10 (12-hour:  $5.37 \pm 0.73$  pg/ml;  $p=0.002$ , 48-hour:  $14.47 \pm 2.39$  pg/ml;  $p=0.018$ ) (**Table 1**).

12 Comparing the two MSC types, AD-MSCs produced significantly more PGE<sub>2</sub> and IL-1 $\beta$  at 12-  
13 and 48-hours, respectively compared to AM-MSCs in inflammatory media (**Figure 1**).  
14 Additionally, AD-MSCs produced more MCP-1 ( $p=0.074$ ) at 12-hours compared to AM-MSCs in  
15 inflammatory media (**Figure 1**). Conversely, AM-MSCs produced significantly more IL-10 at 12-  
16 ( $p=0.002$ ) and 48-hours ( $p=0.004$ ) compared to AD-MSCs when cultured in inflammatory media  
17 (**Figure 2**). Of note, significant differences were also observed comparing the cytokine production  
18 of AD-MSCs and AM-MSCs in control media (**Figures 1&2, Table 1**).

#### 19 *Effect of Inflammation on Extracellular Matrix Mineralization by AD- and AM-MSCs*

20 In non-inflammatory conditions, histological imaging confirmed that AD- and AM-MSCs  
21 produced mineralized ECM as evidenced by positive (red) alizarin staining on the bottom of all

1 wells (**Figure 3**). Additionally, macroscopic images of wells illustrated the formation of white,  
2 mineralized ECM nodules in AD- and AM-MSCs cultures (**Figure 3; inserts**). Inflammation  
3 affected osteogenesis of both MSC types to different degrees. Inflammation resulted in a  
4 significant reduction in the number of mineralized nodules ( $1.33 \pm 0.04$  per well;  $p=0.013$ ) in AD-  
5 MSC cultures compared to control conditions ( $3.33 \pm 0.33$  per well). However, inflammation did  
6 not significantly affect nodule diameter (inflammation:  $0.22 \pm 0.33$ mm, control:  $0.18 \pm 0.02$ mm)  
7 or the amount of Alizarin Red staining (inflammation:  $3.34 \pm 0.05$  RAU, control  $3.46 \pm 0.07$  RAU)  
8 in AD-MSCs cultures (**Figure 3**). Conversely, inflammation resulted in a significant increase the  
9 number of nodules (inflammation:  $27.67 \pm 0.23$  per well, control:  $9.33 \pm 1.86$  per well;  $p=0.009$ )  
10 in AM-MSCs cultures; however, a significant reduction in nodule diameter (inflammation:  $0.23 \pm$   
11  $0.02$ mm, control:  $0.36 \pm 0.05$ mm;  $p=0.002$ ) and the amount of Alizarin Red staining  
12 (inflammation:  $1.08 \pm 0.06$  RAU, control:  $1.80 \pm 0.03$  RAU;  $p<0.001$ ) was observed in AM-MSCs  
13 cultures (**Figure 3**).

14 Comparing the two MSC types, AD-MSCs osteogenesis was impacted to a lesser degree by the  
15 presence of inflammation as compared to AM-MSCs. AD-MSCs demonstrated the formation of a  
16 thin white film of ECM coating the bottom of the wells resulting in significantly fewer nodules  
17 ( $p=0.001$ ) compared to AM-MSCs cultures in inflammatory differentiation media (**Figure 3;**  
18 **inserts**). However, AD-MSCs cultures had significantly higher amounts of total alizarin red  
19 staining ( $p<0.001$ ) compared to AM-MSCs cultures in inflammatory differentiation media (**Figure**  
20 **3**).

21 *Effect of Inflammation on Glycosaminoglycan-Containing Extracellular Matrix Formation by AD-*  
22 *and AM-MSCs*

1 In non-inflammatory conditions, histological imaging confirmed that AD- and AM-MSCs  
2 produced ECM containing GAG as evidenced by positive (blue) staining within all pellets (**Figure**  
3 **4**). Inflammation did affect chondrogenesis of both MSC types to different degrees. Inflammation  
4 resulted in ECM irregularities and voids within the AD-MSC pellets which appeared more fibrous  
5 (**Figure 4**) and demonstrated significant reductions in the percentage of pellet area staining  
6 positively for Alcian blue (inflammation:  $34.75 \pm 2.49\%$ , control:  $57.83 \pm 2.10\%$ ;  $p < 0.001$ ) and  
7 overall pellet cross-sectional area (inflammation:  $2.76 \pm 0.18\text{mm}^2$ , control:  $4.25 \pm 0.22\text{mm}^2$ ;  
8  $p = 0.006$ ) compared to control conditions (**Figure 4**). Conversely, AM-MSC pellets remained  
9 intact with no voids under inflammatory conditions (**Figure 4**) and did not demonstrate a  
10 significant reduction in pellet cross-sectional area (inflammation:  $5.67 \pm 0.26\text{mm}^2$ , control:  $6.20 \pm$   
11  $0.61\text{mm}^2$ ) (**Figure 4**). However, the percentage of pellet area staining positively for Alcian blue  
12 (inflammation:  $82.03 \pm 3.26\%$ , control:  $92.86 \pm 1.01$ ;  $p = 0.019$ ) was significantly reduced.

13 Comparing the two MSC types, AM-MSC chondrogenesis was impacted to a lesser degree by the  
14 presence of inflammation as compared to AD-MSCs. AM-MSCs had significantly greater GAG  
15 staining ( $p < 0.001$ ) and cross-sectional pellet area ( $p = 0.04$ ) compared to AD-MSCs in  
16 inflammation.

#### 17 *Effect of Inflammation on DNA and Glycosaminoglycan Quantification by AD- and AM-MSCs*

18 Inflammation resulted in increased DNA and GAG content in both AD- and AM-MSC pellets  
19 (**Figure 5**). AD-MSC pellet DNA (inflammation:  $0.14 \pm 0.01 \mu\text{g/pellet}$ , control:  $0.05 \pm 0.01$   
20  $\mu\text{g/pellet}$ ;  $p = 0.002$ ) and GAG content (inflammation:  $5.90 \pm 0.57 \mu\text{g/pellet}$ , control:  $2.63 \pm 0.40$   
21  $\mu\text{g/pellet}$ ;  $p = 0.009$ ) significantly increased compared to control conditions (**Figure 5**). AM-MSC  
22 pellet DNA (inflammation:  $0.18 \pm 0.03 \mu\text{g/pellet}$ , control:  $0.10 \pm 0.001 \mu\text{g/pellet}$ ;  $p = 0.048$ ) and

1 GAG content (inflammation:  $8.34 \pm 0.88$   $\mu\text{g}/\text{pellet}$ , control:  $6.95 \pm 0.25$   $\mu\text{g}/\text{pellet}$ ) also increased,  
2 but the latter was not significant (**Figure 5**). However, normalization of pellet GAG content to  
3 DNA indicated that inflammation significantly hindered GAG production by AD-MSCs ( $41.46 \pm$   
4  $1.46$   $\mu\text{g GAG}/\mu\text{g DNA}$ ) and AM-MSCs ( $47.99 \pm 2.66$   $\mu\text{g GAG}/\mu\text{g DNA}$ ) compared to controls  
5 (AD-MSCs:  $49.64 \pm 1.36$   $\mu\text{g GAG}/\mu\text{g DNA}$ , AM-MSCs:  $68.78 \pm 3.45$   $\mu\text{g GAG}/\mu\text{g DNA}$ ) (**Figure**  
6 **5**). Comparing the two MSC types, AM-MSCs produced higher GAG content compared to AD-  
7 MSCs in inflammation ( $p=0.08$ ).

## 8 **DISCUSSION**

9 Our findings suggest that inflammation affects cytokine production and the differentiation capacity  
10 of AD- and AM-MSCs differently. More specifically, AM-MSCs produced more anti-  
11 inflammatory cytokines and cartilaginous ECM compared to AD-MSCs when cultured in the  
12 presence of inflammation. Conversely, AD-MSC culture in inflammation resulted in increased  
13 proliferation and production of more pro-inflammatory cytokines and mineralized ECM compared  
14 to AM-MSCs. These differences may have significant clinical implications when considered in the  
15 context of the local environment of the degenerate IVD.

16 The first significant difference comparing the two MSC sources was that culture in inflammation  
17 resulted in a significant increase in AD-MSC numbers compared to AM-MSCs. In many tissues,  
18 inflammation has been shown to promote activation, migration, and proliferation of resident MSCs  
19 as a mechanism to increase cell numbers at a site of injury and prime them to promote tissue repair  
20 and regeneration. [6,17] Thus, increases in MSC number is generally thought to be a beneficial  
21 response in normal wound healing conditions. However, in the context of the degenerate IVD, it  
22 has been hypothesized that an increase in MSC numbers could quickly deplete the already limited

1 nutrient supply within the tissue and thus may not provide therapeutic benefit.[18] Furthermore, it  
2 is essential to identify the species and amounts of soluble cytokines being released by these MSCs  
3 and to consider their effects on other local cells present in the degenerate IVD.

4 Thus, the second significant difference found comparing the two MSC sources was that AD-MSCs  
5 produced more PGE<sub>2</sub> and MCP-1 at the early (12-hour) time-point compared to AM-MSCs. MCP-  
6 1 is produced by many cell types to recruit macrophages, and other inflammatory cells to sites of  
7 tissue injury, inflammation, or infection.[18] PGE<sub>2</sub> produced by MSCs is thought to exert an anti-  
8 inflammatory effect by shifting infiltrating pro-inflammatory, M1-macrophages towards a pro-  
9 regenerative, M2 phenotype.[5] Thus, enhanced recruitment of macrophages via increased  
10 expression of MCP-1 coupled with increased expression of PGE<sub>2</sub> could subsequently quell local  
11 tissue inflammation. However, in the context of the intact degenerate IVD relatively few blood  
12 vessels are found, and thus infiltration of exogenous macrophages is limited to only the periphery  
13 of the IVD (e.g. cartilaginous end-plates). [19] Therefore, increased concentrations of MCP-1 and  
14 PGE<sub>2</sub>, as observed by AD-MSCs in the current study, may not be beneficial in the context of the  
15 degenerate IVD. More specifically, studies have demonstrated that PGE<sub>2</sub> has a negative impact on  
16 IVD cell health and ECM homeostasis even after short-term exposure.[20,21] Moreover, increased  
17 MCP-1 expression by cells in the IVD correlate positively with increasing histological grades of  
18 IVD degeneration.[3] However, additional studies investigating the impact of elevated levels of  
19 MCP-1 on IVD cell-mediated ECM homeostasis in a three-dimensional (e.g., IVD tissue mimetic)  
20 inflammatory environment are warranted.[22]

21 Another significant difference identified when comparing the cytokine production of AD- and  
22 AM-MSCs in the presence of inflammation was that AM-MSCs produce significantly less pro-  
23 inflammatory IL-1 $\beta$  and significantly more anti-inflammatory IL-10 at the later time-point (48-

1 hour) compared to AD-MSCs. IL-1 $\beta$  is a pro-inflammatory cytokine, which along with TNF- $\alpha$ ,  
2 plays a key role in the progression of IVD degeneration.[3] Increased concentrations of IL-1 $\beta$  have  
3 been shown to cause IVD cells to increase production of tissue degrading proteases, pro-  
4 inflammatory and chemotactic cytokines, concomitant with inhibiting ECM biosynthesis.[2,3]  
5 Thus, the increased production of IL-1 $\beta$  by AD-MSCs observed herein suggests that this MSC  
6 type could exacerbate the pro-inflammatory environment more than AM-MSCs. Conversely, IL-  
7 10 is a potent anti-inflammatory and immune suppressant which plays a prominent autoregulatory  
8 role in the production of pro-inflammatory cytokines by macrophages. [23] In the context of the  
9 degenerate IVD, IL-10 is found in increased levels compared to non-degenerate tissues, [16]  
10 suggesting an endogenous attempt to quell inflammation. Moreover, administration of exogenous  
11 IL-10 to degenerate IVD cell cultures has been shown to decrease transcription of TNF- $\alpha$  and IL-  
12 1 $\beta$ . [24] Thus, the observed increase in production of IL-10 by AM-MSCs in the inflammatory  
13 conditions studied herein could serve as an exogenous source of anti-inflammatories which were  
14 not found to be produced by AD-MSCs. Of note, the decreased production of IL-1 $\beta$  observed in  
15 the AM-MSC group may be related to their increased production of IL-10 suggesting the  
16 possibility of a similar autoregulatory mechanism to that observed in macrophages, however  
17 further study of the specific mechanisms involved are warranted.

18 Another key difference observed comparing MSC types was that the presence of inflammation  
19 detrimentally impacted chondrogenesis of AD-MSCs to a greater extent compared to AM-MSCs.  
20 It is well established that the presence of TNF- $\alpha$  and/or IL-1 $\beta$  impairs chondrogenesis of MSCs.  
21 This is mediated in part via increased translocation of nuclear factor kappa beta (NF- $\kappa$ B) and  
22 inhibition of the transcriptional activator sex determining region Y-box 9 (Sox-9) and transforming  
23 growth factor beta (TGF- $\beta$ ) signaling which is required for chondrogenesis.[25,26] In the present

1 study, although chondrogenesis appeared to be hampered by inflammation in both MSC types  
2 compared to their respective non-inflammatory controls, AM-MSCs cultures yielded larger, intact  
3 chondrogenic pellets, enhanced histological staining, and quantification of GAG compared to AD-  
4 MSCs. Similar differences were observed by others when comparing the effects of IL-1 $\beta$   
5 (10ng/ml), TNF- $\alpha$  (50ng/ml), or human osteoarthritic synovial fluid on AD- and BM-MSCs  
6 chondrogenesis.[27] In the previous studies, it was found that although AD-MSCs pellets  
7 demonstrated histological irregularities including; voids in the pellet, altered cell nucleus  
8 morphology, smaller pellet size, and reduced GAG staining compared to non-inflammatory  
9 controls, they appeared to fare better than BM-MSCs cultures.[27] The reasons for the observed  
10 differences between these studies are still unclear and require further investigation. However, it  
11 could be hypothesized that differences in MSC cytokine receptor expression and thus sensitivity  
12 to inflammation may play a role. Additionally, it is possible that AD-MSCs could have proliferated  
13 more in inflammatory pellet cultures compared to AM-MSCs resulting in a higher nutrient demand  
14 and thus resulting in the formation of a necrotic core and reduction in pellet GAG staining.  
15 Although there was no significant difference found in pellet DNA content comparing AD- and  
16 AM-MSCs at the study end-point, further analysis to confirm this hypothesis is warranted.  
17 Regarding the clinical application of MSCs for IVD degeneration, our results suggest that AM-  
18 MSCs may have an enhanced ability to produce ECM containing GAG, as is typically found within  
19 the nucleus pulposus (NP)-region of the IVD, compared to AD-MSCs. Thus, AM-MSCs may have  
20 a higher propensity to regenerate IVD tissue in mild- to moderately degenerate IVDs.

21 The final significant difference observed comparing MSC types was that the presence of  
22 inflammation detrimentally impacted the osteogenic differentiation of AM-MSCs, but not AD-  
23 MSCs. Previous *in vitro* studies have demonstrated that inflammatory mediators TNF- $\alpha$  and IL-1 $\beta$

1 enhance osteogenesis of human MSCs in a dose-dependent manner,[28] but only if the MSCs are  
2 osteogenically primed or are cultured in the presence of osteogenic signals.[29] While we observed  
3 similar effects in AD-MSC cultures (as was indicated macroscopically by more uniform  
4 mineralization in the wells compared to their non-inflammatory conditions), the converse was true  
5 for AM-MSCs. The difference could be explained in part by the short-term cytokine data which  
6 not only demonstrated elevated levels of IL-1 $\beta$  produced by AD-MSC cultures but also higher  
7 concentrations of PGE<sub>2</sub>. PGE<sub>2</sub> has been shown to be a key cytokine necessary for promoting bone  
8 healing and regeneration. [30,31] However, to further confirm this hypothesis cytokine analysis  
9 on the inflammatory differentiation media at early- and late time-points are warranted. From a  
10 clinical perspective, these results suggest that AD-MSCs may be more prone to forming bone in  
11 the context of the inflammatory environment of the degenerate IVD compared to AM-MSCs.  
12 Provided an osteoinductive cue (e.g., autologous bone graft), AD-MSCs may be more amenable  
13 to promoting fusion to combat the effects of severe degeneration and pseudarthrosis as compared  
14 to AM-MSCs. Conversely, AM-MSCs may better support IVD soft-tissue regeneration.

15 As with any study, limitations were noted. First, the effect of other degenerate IVD environmental  
16 stimuli including other inflammatory cytokines, oxygen tension, pH, limited nutrient supply and  
17 osmolarity, which have been shown to impact MSC effector function and viability, were not  
18 investigated. [32] For example, studies have shown that MSC metabolism is highly dependent  
19 upon the presence of glucose, [33] and that MSCs may be tolerant of or adapt to nutrient  
20 deprivation. [34,35] Moreover, hypoxia may enhance MSC differentiation towards a IVD cell-like  
21 phenotype. [36, 37] However, when combined with hypoxia, long-term nutrient deprivation has  
22 been shown to lead to MSC death. [38] Considering this information, future studies comparing  
23 AD- and AM-MSCs survival and effector function should be performed in an environment



1 reminiscent of nutrient and oxygen deprivation as well as inflammation and extracellular matrix  
2 mechanical strain as would be expected in the degenerate IVD. Completion of such studies would  
3 help to provide a more definitive answer as to which MSC source may be more amenable for  
4 therapeutic use. Regardless, our objective herein was to elucidate the effects of the primary  
5 inflammatory mediators involved in IVD degeneration without overcomplicating the study system.  
6 Secondly, we did not specifically investigate the effect of inflammation on MSC differentiation  
7 toward IVD cell-specific phenotypes (e.g., nucleus pulposus and annulus fibrosus cells). However,  
8 identifying distinguishing phenotypic markers for IVD cells continues to be investigated, [39–41]  
9 and repeatable differentiation protocols to achieve these phenotypes are still being defined. [42]  
10 Moreover, we chose to evaluate bone and cartilage formation as these phenotypes are relevant in  
11 the context of the degenerate IVD. For example, the ectopic bone formation has been observed  
12 following leakage of intradiscally injected MSCs from degenerate IVDs,[43] and products  
13 containing MSCs have been investigated to improve IVD fusions.[44,45] Additionally, although  
14 the relative quantities are different, the primary ECM components that comprise the nucleus  
15 pulposus region of the IVD are similar to that of articular cartilage.[46] Another limitation to the  
16 study was that the differential response of the MSC types to the same inflammatory conditions  
17 could have been due to differences in MSC age and donor variability which was not controlled for  
18 in this study. However, it was not feasible to obtain amnion and adipose tissue samples from the  
19 same donors, and moreover, the younger age of amnion-derived MSCs may represent an actual  
20 clinical advantage over other adult sources. [47]

## 21 **CONCLUSION**

22 AM-MSCs may be more amenable to promote IVD tissue regeneration as compared to AD-MSCs  
23 in the context of the inflammatory environment found in the degenerate IVD. Conversely, AD-

1 MSCs may be more prone to form bone and thus promote IVD fusion. Although our studies did  
2 not compare AD- and AM-MSC survival in a complex environment reminiscent of nutrient and  
3 oxygen deprivation as well as mechanical strains expected in the degenerate IVD, the results herein  
4 provide the impetus for further investigation into the mechanisms underlying the observed  
5 differences between AD- and AM-MSC efficacy as therapeutics for IVD degeneration.

## 6 **ACKNOWLEDGEMENTS**

7 Research reported in this publication was supported in part by the National Institute of General  
8 Medical Sciences of the National Institutes of Health (5P20GM103444). RB is supported by the  
9 National Science Foundation Graduate Research Fellowship (Award number: 2011382).  
10 Disclosures: **RB, AM, MB, JM:** No competing financial interests exist. **SG:** Speaking and/or  
11 Teaching Arrangements- OrthoFix. **JT:** Royalties- Arthrex; Consulting- Arthrex; Speaking and/or  
12 Teaching Arrangements- Arthrex and Johnson & Johnson; Grants- Mayo Clinic.

13

14

15

16

17

18

19

20

## 1 REFERENCES

- 2 [1] Martin BI, Deyo RA, Mirza SK, Turner JA, Comstock BA, Hollingworth W, et al.  
3 Expenditures and Health Status Among Adults With Back and Neck Problems. *JAMA*  
4 2008;299:656. doi:10.1001/jama.299.6.656.
- 5 [2] Johnson ZI, Schoepflin ZR, Choi H, Shapiro IM, Risbud M V. Disc in flames: Roles of  
6 TNF- $\alpha$  and IL-1 $\beta$  in intervertebral disc degeneration. *Eur Cell Mater* 2015;30:104-16;  
7 discussion 116-7.
- 8 [3] Phillips KLE, Cullen K, Chiverton N, Michael ALR, Cole AA, Breakwell LM, et al.  
9 Potential roles of cytokines and chemokines in human intervertebral disc degeneration:  
10 Interleukin-1 is a master regulator of catabolic processes. *Osteoarthr Cartil* 2015;23:1165–  
11 77. doi:10.1016/j.joca.2015.02.017.
- 12 [4] Sampara P, Banala RR, Vemuri SK, AV GR, GPV S. Understanding the molecular biology  
13 of intervertebral disc degeneration and potential gene therapy strategies for regeneration: a  
14 review. *Gene Ther* 2018;25:67–82. doi:10.1038/s41434-018-0004-0.
- 15 [5] Prockop DJ, Youn Oh J. Mesenchymal stem/stromal cells (MSCs): Role as guardians of  
16 inflammation. *Mol Ther* 2012;20:14–20. doi:10.1038/mt.2011.211.
- 17 [6] Kizil C, Kyritsis N, Brand M. Effects of inflammation on stem cells: together they strive?  
18 *EMBO Rep* 2015;16:416–26. doi:10.15252/embr.201439702.
- 19 [7] Kyurkchiev D. Secretion of immunoregulatory cytokines by mesenchymal stem cells.  
20 *World J Stem Cells* 2014;6:552. doi:10.4252/wjsc.v6.i5.552.
- 21 [8] Sakai D, Schol J. Cell therapy for intervertebral disc repair: Clinical perspective. *J Orthop*

- 1 Transl 2017;9:8–18. doi:10.1016/j.jot.2017.02.002.
- 2 [9] Richardson SM, Kalamegam G, Pushparaj PN, Matta C, Memic A, Khademhosseini A, et  
3 al. Mesenchymal stem cells in regenerative medicine: Focus on articular cartilage and  
4 intervertebral disc regeneration. *Methods* 2016;99:69–80.  
5 doi:10.1016/j.ymeth.2015.09.015.
- 6 [10] Noriega DC, Ardura F, Hernández-Ramajo R, Martín-Ferrero MÁ, Sánchez-Lite I, Toribio  
7 B, et al. Intervertebral Disc Repair by Allogeneic Mesenchymal Bone Marrow Cells: A  
8 Randomized Controlled Trial. *Transplantation* 2017;101:1945–51.  
9 doi:10.1097/TP.0000000000001484.
- 10 [11] Kumar H, Ha D-H, Lee E-J, Park JH, Shim JH, Ahn T-K, et al. Safety and tolerability of  
11 intradiscal implantation of combined autologous adipose-derived mesenchymal stem cells  
12 and hyaluronic acid in patients with chronic discogenic low back pain: 1-year follow-up of  
13 a phase I study. *Stem Cell Res Ther* 2017;8:262. doi:10.1186/s13287-017-0710-3.
- 14 [12] Topoluk N, Hawkins R, Tokish J, Mercuri J. Amniotic Mesenchymal Stromal Cells Exhibit  
15 Preferential Osteogenic and Chondrogenic Differentiation and Enhanced Matrix Production  
16 Compared With Adipose Mesenchymal Stromal Cells. *Am J Sports Med* 2017;45:2637–46.  
17 doi:10.1177/0363546517706138.
- 18 [13] Mohamed-Ahmed S, Fristad I, Lie SA, Suliman S, Mustafa K, Vindenes H, et al. Adipose-  
19 derived and bone marrow mesenchymal stem cells: a donor-matched comparison. *Stem Cell*  
20 *Res Ther* 2018;9:168. doi:10.1186/s13287-018-0914-1.
- 21 [14] Clarke LE, McConnell JC, Sherratt MJ, Derby B, Richardson SM, Hoyland JA. Growth

- 1 differentiation factor 6 and transforming growth factor-beta differentially mediate  
2 mesenchymal stem cell differentiation, composition, and micromechanical properties of  
3 nucleus pulposus constructs. *Arthritis Res Ther* 2014;16:R67. doi:10.1186/ar4505.
- 4 [15] Topoluk N, Steckbeck K, Siatkowski S, Burnikel B, Tokish J, Mercuri J. Amniotic  
5 mesenchymal stem cells mitigate osteoarthritis progression in a synovial macrophage-  
6 mediated in vitro explant coculture model. *J Tissue Eng Regen Med* 2018;12:1097–110.  
7 doi:10.1002/term.2610.
- 8 [16] Cai F, Zhu L, Wang F, Shi R, Xie X-H, Hong X, et al. The Paracrine Effect of Degenerated  
9 Disc Cells on Healthy Human Nucleus Pulposus Cells Is Mediated by MAPK and NF- $\kappa$ B  
10 Pathways and Can Be Reduced by TGF- $\beta$ 1. *DNA Cell Biol* 2017;36:143–58.  
11 doi:10.1089/dna.2016.3230.
- 12 [17] Michael S, Achilleos C, Panayiotou T, Strati K. Inflammation Shapes Stem Cells and  
13 Stemness during Infection and Beyond. *Front Cell Dev Biol* 2016;4:1–7.  
14 doi:10.3389/fcell.2016.00118.
- 15 [18] Ghosh P, Moore R, Vernon-Roberts B, Goldschlager T, Pascoe D, Zannettino A, et al.  
16 Immunoselected STRO-3<sup>+</sup> mesenchymal precursor cells and restoration of the extracellular  
17 matrix of degenerate intervertebral discs. *J Neurosurg Spine* 2012;16:479–88.  
18 doi:10.3171/2012.1.SPINE11852.
- 19 [19] Nakazawa KR, Walter BA, Laudier DM, Krishnamoorthy D, Mosley GE, Spiller KL, et al.  
20 Accumulation and localization of macrophage phenotypes with human intervertebral disc  
21 degeneration. *Spine J* 2018;18:343–56. doi:10.1016/j.spinee.2017.09.018.

- 1 [20] Hiyama A, Yokoyama K, Nukaga T, Sakai D, Mochida J. Response to tumor necrosis  
2 factor- $\alpha$  mediated inflammation involving activation of prostaglandin E2 and Wnt signaling  
3 in nucleus pulposus cells. *J Orthop Res* 2015;33:1756–68. doi:10.1002/jor.22959.
- 4 [21] Vo N V, Sowa GA, Kang JD, Seidel C, Studer RK. Prostaglandin E2 and prostaglandin F2 $\alpha$   
5 differentially modulate matrix metabolism of human nucleus pulposus cells. *J Orthop Res*  
6 2010;28:1259–66. doi:10.1002/jor.21157.
- 7 [22] Gruber HE, Hoelscher GL, Ingram JA, Bethea S, Cox M, Hanley EN. Proinflammatory  
8 cytokines modulate the chemokine CCL2 (MCP-1) in human annulus cells in vitro: CCL2  
9 expression and production. *Exp Mol Pathol* 2015;98:102–5.  
10 doi:10.1016/j.yexmp.2014.12.002.
- 11 [23] de Waal Malefyt R, Abrams J, Bennett B, Figdor CG, de Vries JE. Interleukin 10(IL-10)  
12 inhibits cytokine synthesis by human monocytes: an autoregulatory role of IL-10 produced  
13 by monocytes. *J Exp Med* 1991;174:1209–20.
- 14 [24] Li W, Liu T, Wu L, Chen C, Jia Z, Bai X, et al. Blocking the function of inflammatory  
15 cytokines and mediators by using IL-10 and TGF- $\beta$ : A potential biological immunotherapy  
16 for intervertebral disc degeneration in a beagle model. *Int J Mol Sci* 2014;15:17270–83.  
17 doi:10.3390/ijms151017270.
- 18 [25] Wehling N, Palmer GD, Pilapil C, Liu F, Wells JW, Müller PE, et al. Interleukin-1beta and  
19 tumor necrosis factor alpha inhibit chondrogenesis by human mesenchymal stem cells  
20 through NF-kappaB-dependent pathways. *Arthritis Rheum* 2009;60:801–12.  
21 doi:10.1002/art.24352.

- 1 [26] Heldens GTH, Blaney Davidson EN, Vitters EL, Schreurs BW, Piek E, van den Berg WB,  
2 et al. Catabolic Factors and Osteoarthritis-Conditioned Medium Inhibit Chondrogenesis of  
3 Human Mesenchymal Stem Cells. *Tissue Eng Part A* 2012;18:45–54.  
4 doi:10.1089/ten.tea.2011.0083.
- 5 [27] Pagani S, Borsari V, Veronesi F, Ferrari A, Cepollaro S, Torricelli P, et al. Increased  
6 Chondrogenic Potential of Mesenchymal Cells From Adipose Tissue Versus Bone Marrow-  
7 Derived Cells in Osteoarthritic In Vitro Models. *J Cell Physiol* 2017;232:1478–88.  
8 doi:10.1002/jcp.25651.
- 9 [28] Ding J, Ghali O, Lencel P, Broux O, Chauveau C, Devedjian JC, et al. TNF- $\alpha$  and IL-1 $\beta$   
10 inhibit RUNX2 and collagen expression but increase alkaline phosphatase activity and  
11 mineralization in human mesenchymal stem cells. *Life Sci* 2009;84:499–504.  
12 doi:10.1016/j.lfs.2009.01.013.
- 13 [29] Croes M, Oner FC, Kruyt MC, Blokhuis TJ, Bastian O, Dhert WJA, et al. Proinflammatory  
14 mediators enhance the osteogenesis of Human Mesenchymal stem cells after lineage  
15 commitment. *PLoS One* 2015;10:1–14. doi:10.1371/journal.pone.0132781.
- 16 [30] Mountziaris PM, Spicer PP, Kasper FK, Mikos AG. Harnessing and Modulating  
17 Inflammation in Strategies for Bone Regeneration. *Tissue Eng Part B Rev* 2011;17:393–  
18 402. doi:10.1089/ten.teb.2011.0182.
- 19 [31] Yoon DS, Yoo JH, Kim YH, Paik S, Han CD, Lee JW. The Effects of COX-2 Inhibitor  
20 During Osteogenic Differentiation of Bone Marrow-Derived Human Mesenchymal Stem  
21 Cells. *Stem Cells Dev* 2010;19:1523–33. doi:10.1089/scd.2009.0393.

- 1 [32] Huang YC, Leung VYL, Lu WW, Luk KDK. The effects of microenvironment in  
2 mesenchymal stem cell–based regeneration of intervertebral disc. *Spine J* 2013;13:352–62.  
3 doi:10.1016/j.spinee.2012.12.005.
- 4 [33] Nuschke A, Rodrigues M, Wells AW, Sylakowski K, Wells A. Mesenchymal stem  
5 cells/multipotent stromal cells (MSCs) are glycolytic and thus glucose is a limiting factor  
6 of in vitro models of MSC starvation. *Stem Cell Res Ther* 2016;179:1-9. doi  
7 10.1186/s13287-016-0436-7.
- 8 [34] Turner SA, Wright KT, Jones PN, Balain B, Roberts S. Temporal analysis of the response  
9 of intervertebral disc cells and mesenchymal stem cells to nutrient deprivation. *Stem Cells*  
10 *Int* 2016;5415901:1-13. doi:10.1155/2016/5415901
- 11 [35] Huang YC, Yang ZM, Chen, XH, Tan MY, Wang, J, Li, XQ, Deng, L. Isolation of  
12 mesenchymal stem cells from human placental decidua basalis and resistance to hypoxia  
13 and serum deprivation. *Stem Cell Rev* 2008;5(3):247-55. doi 10.1007/s12015-009-9069-x.
- 14 [36] Ni L, Liu X, Sockacki KR, Ebraheim M, Fahrenkopf M, Shi Q, Liu J, Yang H. Effects of  
15 hypoxia on differentiation from human placenta-derived mesenchymal stem cells to nucleus  
16 pulposus-like cells. *Spine J* 2014;10:2451-8. doi 10.1016/j.spinee.2014.03.028
- 17 [37] Hudson KD, Bonassar LJ. Hypoxic expansion of human mesenchymal stem cells enhances  
18 three-dimensional maturation of tissue-engineered intervertebral discs. *Tissue Eng Part A*  
19 2017;7-8:293-300. doi 10.1089/ten.TEA.2016.0270
- 20 [38] Potier E, Ferreira A, Meunier A, Sedel L, Logeart-Avramoglou D, Petite H. Prolonged  
21 hypoxia concomitant with serum deprivation induces massive human mesenchymal stem  
22 cell death. *Tissue Eng* 2007;6:1325-31. doi 10.1089/ten.2006.0325



- 1 [39] Rodrigues-Pinto R, Ward L, Humphreys M, Zeef LAH, Berry A, Hanley KP, et al. Human  
2 notochordal cell transcriptome unveils potential regulators of cell function in the developing  
3 intervertebral disc. *Sci Rep* 2018;8:12866. doi:10.1038/s41598-018-31172-4.
- 4 [40] van den Akker GGH, Koenders MI, van de Loo FAJ, van Lent PLEM, Blaney Davidson E,  
5 van der Kraan PM. Transcriptional profiling distinguishes inner and outer annulus fibrosus  
6 from nucleus pulposus in the bovine intervertebral disc. *Eur Spine J* 2017;26:2053–62.  
7 doi:10.1007/s00586-017-5150-3.
- 8 [41] Minogue BM, Richardson SM, Zeef LAH, Freemont AJ, Hoyland JA. Characterization of  
9 the human nucleus pulposus cell phenotype and evaluation of novel marker gene expression  
10 to define adult stem cell differentiation. *Arthritis Rheum* 2010;62:3695–705.  
11 doi:10.1002/art.27710.
- 12 [42] Tang R, Jing L, Willard VP, Wu C, Guilak F, Chen J, et al. Differentiation of human induced  
13 pluripotent stem cells into nucleus pulposus-like cells. *Stem Cell Res Ther* 2018;9:61.  
14 doi:10.1186/s13287-018-0797-1.
- 15 [43] Vadalà G, Sowa G, Hubert M, Gilbertson LG, Denaro V, Kang JD. Mesenchymal stem cells  
16 injection in degenerated intervertebral disc: cell leakage may induce osteophyte formation.  
17 *J Tissue Eng Regen Med* 2012;6:348–55. doi:10.1002/term.433.
- 18 [44] Hayashi T, Wang J, Lord E, Suxuki A, Takahashi S, Scott T, et al. A Comparison of  
19 Commercially Available Demineralized Bone Matrix with and without Human  
20 Mesenchymal Stem Cells in a Rodent Spinal Fusion Model. *J Neurosurg Spine* 2016;March  
21 11:1–5. doi:10.3171/2015.12.SPINE15737.

- 1 [45] Peppers TA, Bullard DE, Vanichkachorn JS, Stanley SK, Arnold PM, Waldorff EI, et al.  
2 Prospective clinical and radiographic evaluation of an allogeneic bone matrix containing  
3 stem cells (Trinity Evolution® Viable Cellular Bone Matrix) in patients undergoing two-  
4 level anterior cervical discectomy and fusion. *J Orthop Surg Res* 2017;12:1–6.  
5 doi:10.1186/s13018-017-0564-5.
- 6 [46] Mwale F, Roughley P, Antoniou J. Distinction between the extracellular matrix of the  
7 nucleus pulposus and hyaline cartilage: a requisite for tissue engineering of intervertebral  
8 disc. *Eur Cell Mater* 2004;8:58-63; discussion 63-4.
- 9 [47] Wu H, Shang Y, Yu J, Zeng X, Lin J, Tu M, et al. Regenerative potential of human nucleus  
10 pulposus resident stem/progenitor cells declines with ageing and intervertebral disc  
11 degeneration. *Int J Mol Med* 2018. doi:10.3892/ijmm.2018.3766.
- 12  
13  
14  
15  
16  
17  
18  
19  
20

1 **Table1. Summary of cytokine production profile of human MSCs in control and**  
 2 **inflammatory culture conditions.** Table depicting pro- and anti-inflammatory cytokine  
 3 concentrations produced by AD- and AM-MSCs following 24- and 48-hours of culture in the  
 4 absence (Control) or presence (INF) of IL-1 $\beta$  and TNF- $\alpha$ . \* indicates a significant difference  
 5 between culture conditions within MSC type ( $p \leq 0.050$ ).

| [pg/mL]                        | AD-MSCs              |                                        |                  |                    |                                         |                  |
|--------------------------------|----------------------|----------------------------------------|------------------|--------------------|-----------------------------------------|------------------|
|                                | 12hr                 |                                        |                  | 48hr               |                                         |                  |
|                                | Control              | INF                                    | P-value          | Control            | INF                                     | P-value          |
| <b>PGE2</b>                    | 0.00 $\pm$ 0.00      | <b>1593.80 <math>\pm</math> 46.51*</b> | <b>&lt;0.001</b> | 23.00 $\pm$ 4.38   | <b>1118.30 <math>\pm</math> 115.56*</b> | <b>0.005</b>     |
| <b>MCP-1</b>                   | 100.60 $\pm$ 24.30   | <b>1154.20 <math>\pm</math> 52.57*</b> | <b>&lt;0.001</b> | 334.27 $\pm$ 85.05 | <b>1301.70 <math>\pm</math> 63.71*</b>  | <b>&lt;0.001</b> |
| <b>IL-1<math>\alpha</math></b> | 0.00 $\pm$ 0.00      | 1.03 $\pm$ 1.03                        | 0.495            | 0.00 $\pm$ 0.00    | 5.47 $\pm$ 2.03                         | 0.054            |
| <b>IL-1<math>\beta</math></b>  | 0.00 $\pm$ 0.00      | <b>220.27 <math>\pm</math> 32.48*</b>  | <b>0.013</b>     | 0.00 $\pm$ 0.00    | <b>185.40 <math>\pm</math> 7.63*</b>    | <b>&lt;0.001</b> |
| <b>IL-4</b>                    | 0.00 $\pm$ 0.00      | 1.13 $\pm$ 1.13                        | 0.495            | 0.00 $\pm$ 0.00    | 1.90 $\pm$ 1.90                         | 0.370            |
| <b>IL-6</b>                    | 3537.80 $\pm$ 462.20 | 4000.00 $\pm$ 0.00                     | 0.272            | 4000.00 $\pm$ 0.00 | 4000.00 $\pm$ 0.00                      | 0.999            |
| <b>IL-8</b>                    | 0.00 $\pm$ 0.00      | <b>800.00 <math>\pm</math> 0.00*</b>   | <b>&lt;0.001</b> | 0.00 $\pm$ 0.00    | <b>800.00 <math>\pm</math> 0.00*</b>    | <b>&lt;0.001</b> |
| <b>IL-10</b>                   | 0.00 $\pm$ 0.00      | 0.00 $\pm$ 0.00                        | 0.999            | 0.00 $\pm$ 0.00    | 0.00 $\pm$ 0.00                         | 0.999            |

6  
7  
8  
9  
10

| [pg/mL]                        | AM-MSCs        |                         |                  |                |                          |                  |
|--------------------------------|----------------|-------------------------|------------------|----------------|--------------------------|------------------|
|                                | 12hr           |                         |                  | 48hr           |                          |                  |
|                                | Control        | INF                     | p-value          | Control        | INF                      | p-value          |
| <b>PGE2</b>                    | 74.72 ± 9.17   | <b>1291.40 ± 78.47*</b> | <b>0.001</b>     | 39.99 ± 4.71   | <b>1158.70 ± 138.99*</b> | <b>0.008</b>     |
| <b>MCP-1</b>                   | 291.85 ± 57.85 | <b>1018.30 ± 22.34*</b> | <b>&lt;0.001</b> | 284.25 ± 54.95 | <b>1198.60 ± 32.20*</b>  | <b>&lt;0.001</b> |
| <b>IL-1<math>\alpha</math></b> | 2.20 ± 0.10    | 4.23 ± 1.09             | 0.248            | 2.35 ± 0.35    | 6.17 ± 1.77              | 0.196            |
| <b>IL-1<math>\beta</math></b>  | 3.55 ± 3.55    | <b>226.73 ± 22.81*</b>  | <b>0.005</b>     | 4.30 ± 4.30    | <b>144.10 ± 4.57*</b>    | <b>&lt;0.001</b> |
| <b>IL-4</b>                    | 6.80 ± 0.40    | 4.75 ± 1.05             | 0.210            | 6.10 ± 0.20    | 5.77 ± 3.03              | 0.938            |
| <b>IL-6</b>                    | 66.55 ± 17.25  | <b>4000.00 ± 0.00*</b>  | <b>&lt;0.001</b> | 38.95 ± 7.85   | <b>4000.00 ± 0.00*</b>   | <b>&lt;0.001</b> |
| <b>IL-8</b>                    | 97.95 ± 25.25  | <b>800.00 ± 0.00*</b>   | <b>&lt;0.001</b> | 91.25 ± 12.65  | <b>800.00 ± 0.00*</b>    | <b>&lt;0.001</b> |
| <b>IL-10</b>                   | 0.00 ± 0.00    | <b>5.37 ± 0.73*</b>     | <b>0.002</b>     | 0.00 ± 0.00    | <b>14.47 ± 2.39*</b>     | 0.018            |

1

2 *\* indicates significance (p≤0.050) compared between culture conditions at respective time point*

3

4

5

6

7

8

9

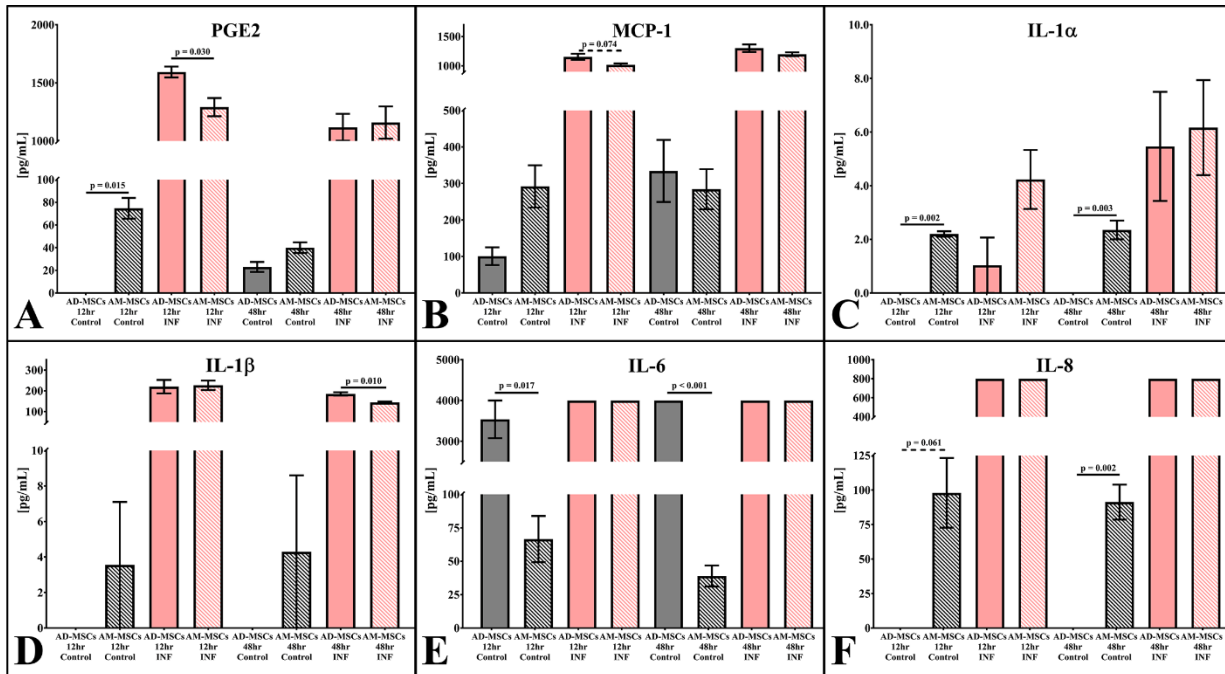

1

2 **Fig1. Pro-inflammatory cytokine production profile of human MSCs in control and**  
 3 **inflammatory culture conditions.** Graphs depicting production of pro-inflammatory cytokines  
 4 by AD- and AM-MSCs following 24- and 48-hours of culture in the absence (Control; gray bars)  
 5 or presence of IL-1β and TNF-α (INF: pink bars). Solid lines connecting bars indicate significant  
 6 differences between cell types within the same culture condition (p ≤ 0.050). Dotted lines  
 7 connecting bars indicate a significant trend between cell types within the same culture condition  
 8 (p ≤ 0.080).

9

10

11

12

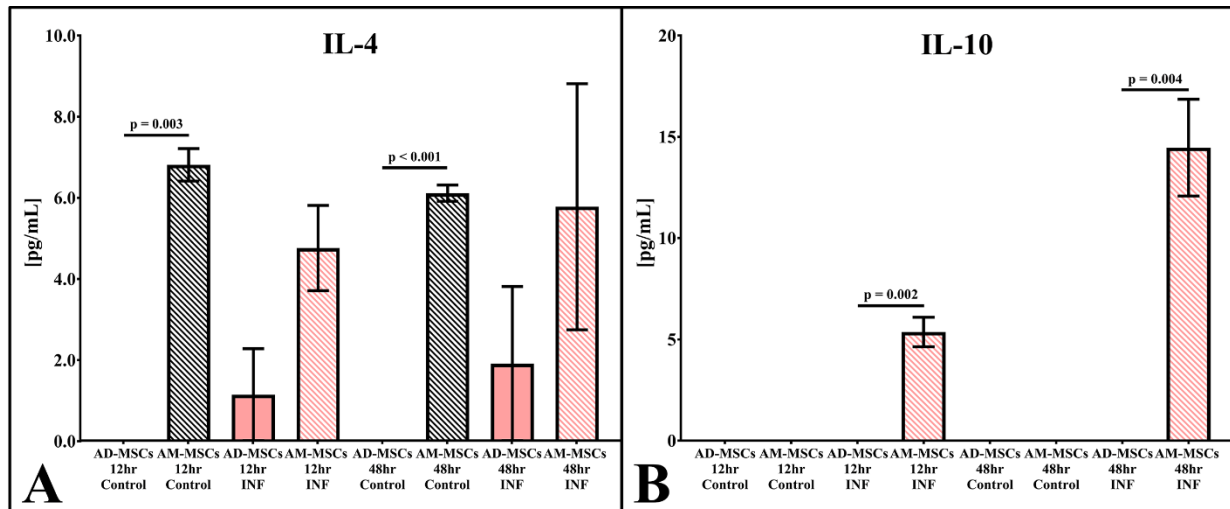

1  
2 **Fig2. Anti-inflammatory cytokine production profile of human MSCs in control and**  
3 **inflammatory culture conditions.** Graphs depicting production of anti-inflammatory cytokines  
4 by AD- and AM-MSCs following 24- and 48-hours of culture in the absence (Control; gray bars)  
5 or presence of IL-1 $\beta$  and TNF- $\alpha$  (INF: pink bars). Solid lines connecting bars indicate significant  
6 differences between cell types within the same culture condition ( $p \leq 0.050$ ). Dotted lines  
7 connecting bars indicate a significant trend between cell types within the same culture condition  
8 ( $p \leq 0.080$ ).

9  
10  
11  
12  
13  
14

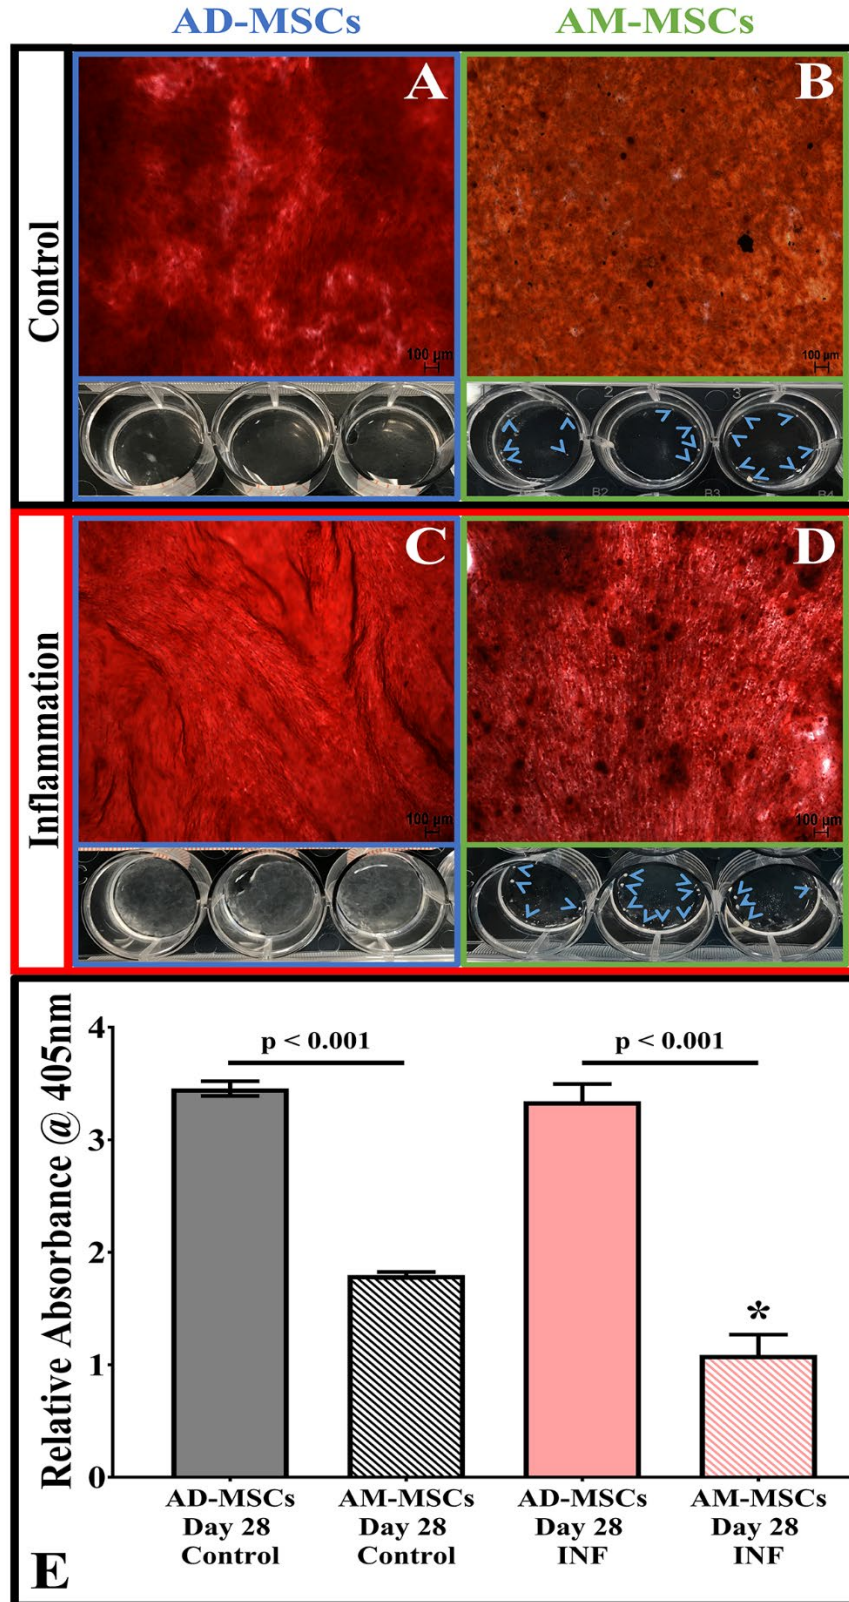

1 **Fig3: Osteogenic potential of human MSCs in control and inflammatory culture conditions.**  
2 Representative alizarin red staining (red = mineralized ECM) in **A)** AD- and **B)** AM-MSC  
3 osteogenic cultures in control (non-inflammatory) conditions. (inserts = macroscopic imaging of  
4 wells illustrating mineralization (white pellets indicated by arrowheads). Representative alizarin  
5 red staining (red = mineralized ECM) in **C)** AD- and **D)** AM-MSC osteogenic cultures in  
6 inflammatory conditions. (inserts = macroscopic imaging of wells illustrating mineralization  
7 (white pellets). **E)** Graph depicting quantification of alizarin red staining of AD- and AM-MSCs  
8 in control (non-inflammatory) and inflammatory conditions. Magnification = 50x. Scale bars =  
9 100 $\mu$ m. Solid lines connecting bars indicate significant differences between MSC type within the  
10 same culture conditions ( $p \leq 0.050$ ). \* Indicates significant difference between culture conditions  
11 within MSC type ( $p \leq 0.050$ ).

12

13

14

15

16

17

18

19

20



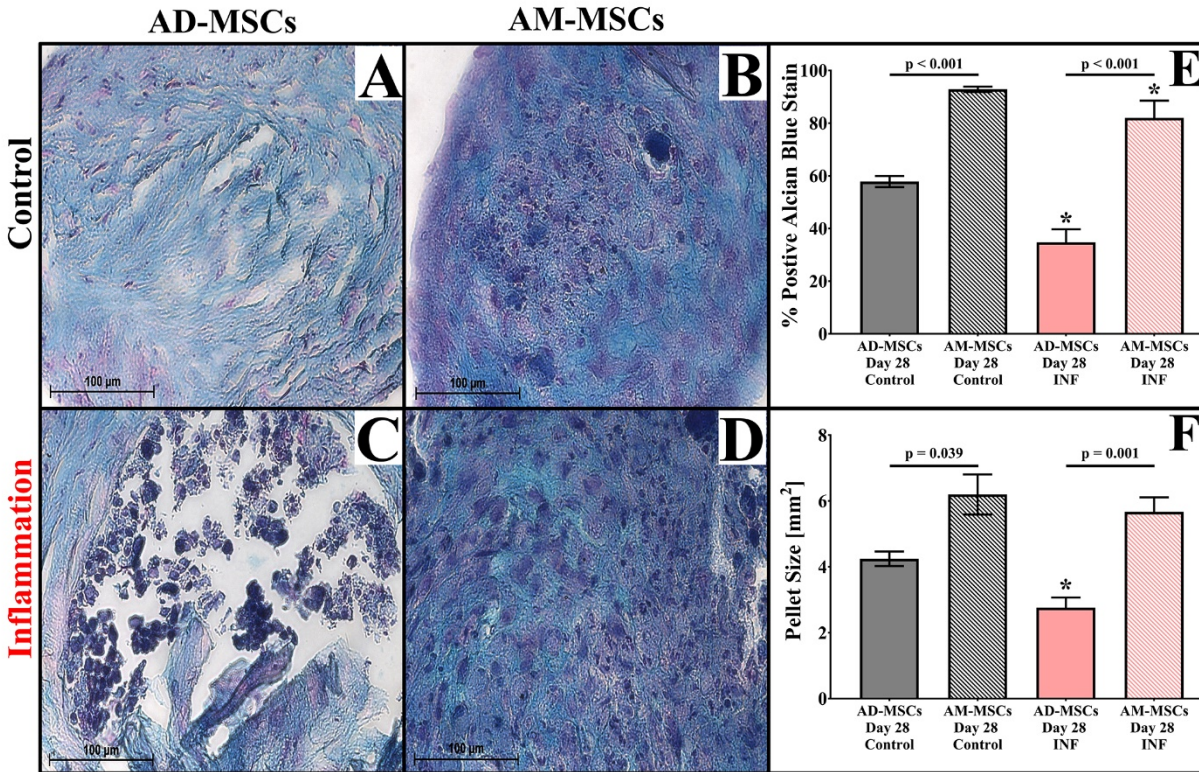

1  
2 **Fig4: Chondrogenic potential of human MSCs in control and inflammatory culture**  
3 **conditions.** Representative Alcian blue staining (blue = GAG-containing ECM, purple = cell  
4 nuclei) in **A)** AD- and **B)** AM-MSC chondrogenic pellet cultures in control (non-inflammatory)  
5 and **C)** AD- and **D)** AM-MSC chondrogenic pellet cultures in inflammatory conditions. Graphs  
6 depicting quantification of **E)** the percentage of pellet area stained positively for GAG and **F)**  
7 cross-sectional pellet area of AD- and AM-MSCs in control (non-inflammatory) and inflammatory  
8 conditions. Magnification = 400x. Scale bars = 100µm. Solid lines connecting bars indicate  
9 significant differences between MSC type within the same culture conditions ( $p \leq 0.050$ ). \*  
10 Indicates significant difference between culture conditions within MSC type.

11

12

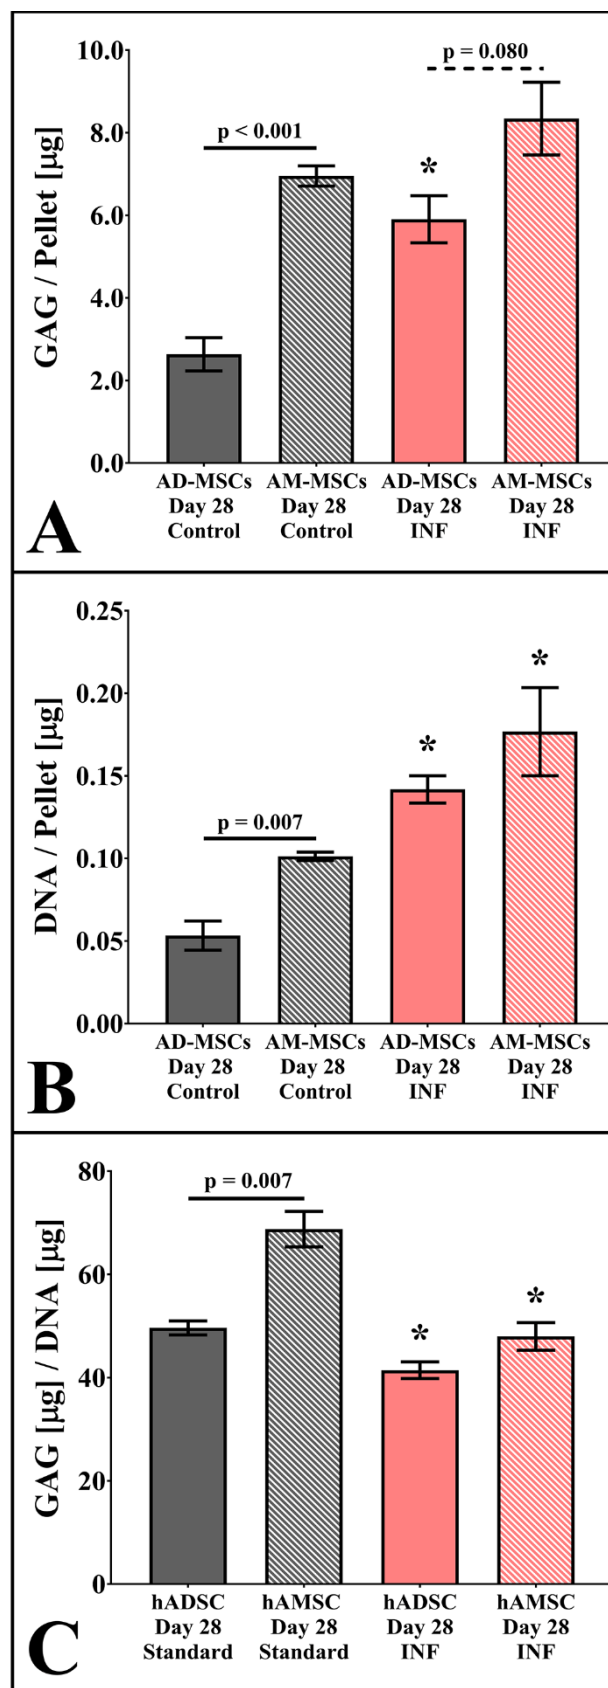

1 **Fig5: DNA and GAG quantification of human MSCs in control and inflammatory culture**  
2 **conditions.** Graphs depicting quantification of **A) GAG** and **B) DNA** content per AD- and AM-  
3 MSC chondrogenic pellet culture in control (non-inflammatory) and inflammatory conditions. **C)**  
4 Graph depicting GAG normalized to DNA content for AD- and AM-MSC chondrogenic pellet  
5 culture in control (non-inflammatory) and inflammatory conditions. Solid lines connecting bars  
6 indicate significant differences between MSC type within the same culture conditions ( $p \leq 0.050$ ).  
7 \* Indicates significant difference between culture conditions within MSC type. Dotted lines  
8 connecting bars indicate a significant trend between cell types within the same culture condition  
9 ( $p \leq 0.080$ ).

10

11

12

13

14

15

16

17

18

19

20

1 **Supplemental Table 1. Summary of osteogenesis and chondrogenesis differentiation**  
 2 **quantification of human MSCs in control and inflammatory culture conditions.** Table depicts  
 3 the representative quantitative outcomes of the differentiation potential of AD- and AM-MSCs  
 4 following 28 days of culture in the absence (Control) or presence (INF) of IL-1 $\beta$  and TNF- $\alpha$ .  
 5 Osteogenesis outcomes include: Relative absorbance units (RAU) of Alizarin Red staining for  
 6 mineralized extracellular matrix production. Chondrogenesis outcomes include: Normalized  
 7 glycosaminoglycan (GAG) content to the respective pellet's DNA content, percentage of pellet  
 8 positively stained for Alcian Blue indicating GAG presence, pellet cross-sectional area, and  
 9 percent reduction of pellet cross-sectional area from its respective Day 0 measurements. \* indicates  
 10 a significant difference between culture conditions within MSC type ( $p \leq 0.050$ ).

11

| Day 28                                                        | AD-MSCs          |                                     | AM-MSCs          |                                     |
|---------------------------------------------------------------|------------------|-------------------------------------|------------------|-------------------------------------|
|                                                               | Control          | INF                                 | Control          | INF                                 |
| Alizarin Red staining for Osteogenesis [RAU]                  | 3.46 $\pm$ 0.07  | 3.34 $\pm$ 0.05                     | 1.80 $\pm$ 0.03  | <b>1.09 <math>\pm</math> 0.06*</b>  |
| Normalized GAG to DNA [ $\mu$ g GAG / $\mu$ g DNA]            | 49.64 $\pm$ 1.36 | <b>41.46 <math>\pm</math> 1.62*</b> | 68.78 $\pm$ 3.45 | <b>47.99 <math>\pm</math> 2.66*</b> |
| Alcian Blue Staining for GAG [% of Pellet Positively Stained] | 57.83 $\pm$ 2.10 | <b>34.75 <math>\pm</math> 2.49*</b> | 92.86 $\pm$ 1.01 | <b>82.03 <math>\pm</math> 3.26*</b> |
| Pellet Cross-Sectional Area [ $\text{mm}^2$ ]                 | 4.25 $\pm$ 0.22  | <b>2.76 <math>\pm</math> 0.18*</b>  | 6.20 $\pm$ 0.61  | 5.67 $\pm$ 0.26                     |
| % Reduction of Pellet Cross-Sectional Area from Day 0         | 5.63 $\pm$ 10.62 | <b>38.59 <math>\pm</math> 7.66*</b> | 8.14 $\pm$ 1.86  | 19.42 $\pm$ 7.03                    |

12

*\* indicates significance ( $p \leq 0.050$ ) compared between culture conditions*

13
